# Supplementary material for: ATG Exposure in T Replete Transplant for Hematological Malignancies: Real World Analysis from BMT CTN 1202
Source: Research Square preprint supplement (doi:10.21203/rs.3.rs-9918950/v1), 2026-06-17
Supplement: Supplementary file 1 [file 150b29f249376a8e72c545c1.pdf]

# Supplemental Figure 2: rATG exposure and GVHD

## A

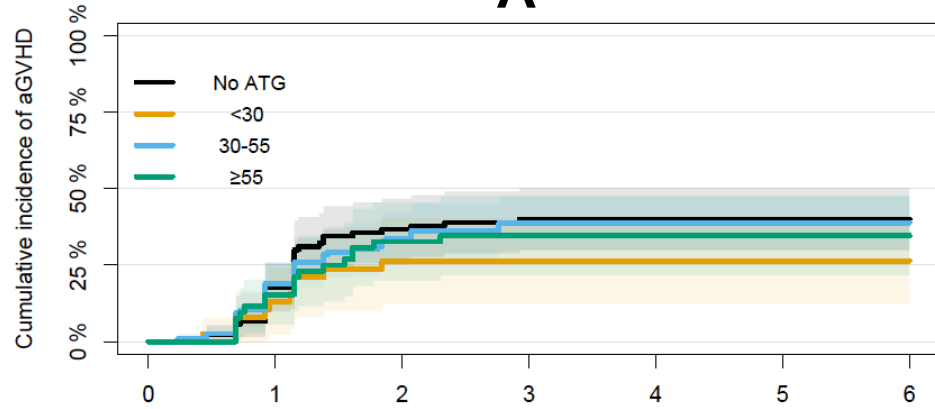

| ATG exposure | 0   | 1  | 2  | 3  | 4  | 5  | 6  |
|--------------|-----|----|----|----|----|----|----|
| No ATG       | 90  | 67 | 49 | 44 | 44 | 43 | 39 |
| <30          | 38  | 31 | 23 | 23 | 22 | 22 | 22 |
| 30-55        | 116 | 87 | 65 | 58 | 58 | 56 | 48 |
| ≥55          | 52  | 41 | 28 | 25 | 22 | 19 | 18 |

## B

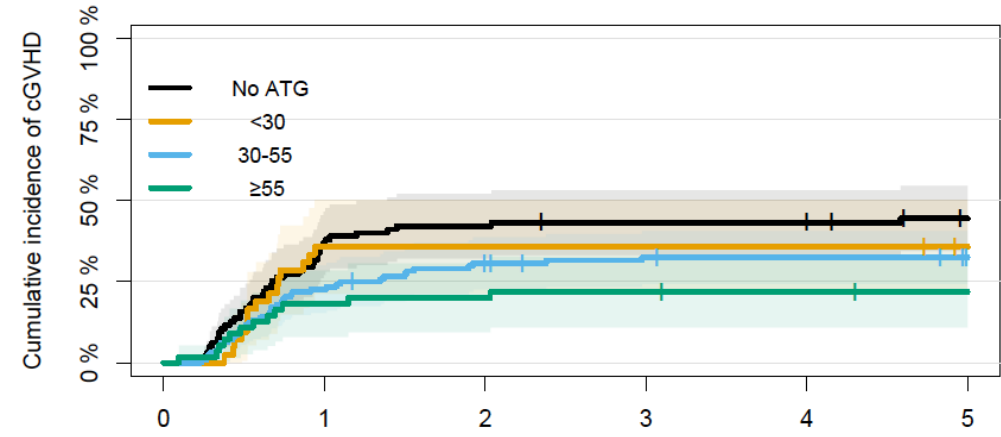

| ATG exposure | 0   | 1  | 2  | 3  | 4  | 5  |
|--------------|-----|----|----|----|----|----|
| No ATG       | 95  | 26 | 18 | 15 | 14 | 10 |
| <30          | 42  | 14 | 14 | 13 | 13 | 11 |
| 30-55        | 128 | 41 | 25 | 19 | 17 | 13 |
| ≥55          | 55  | 17 | 11 | 8  | 6  | 5  |

## C

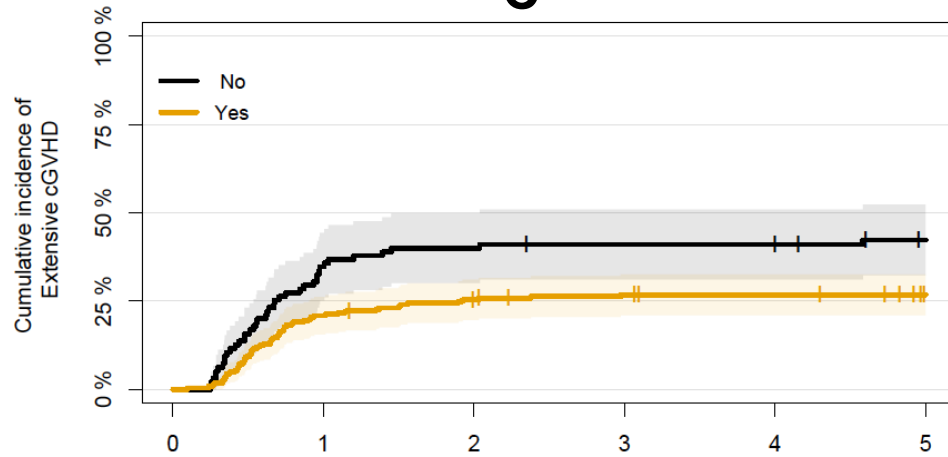

| ATG exposure | 0   | 1  | 2  | 3  | 4  | 5  |
|--------------|-----|----|----|----|----|----|
| No ATG       | 95  | 26 | 18 | 15 | 14 | 10 |
| <30          | 225 | 72 | 50 | 40 | 36 | 29 |

## D

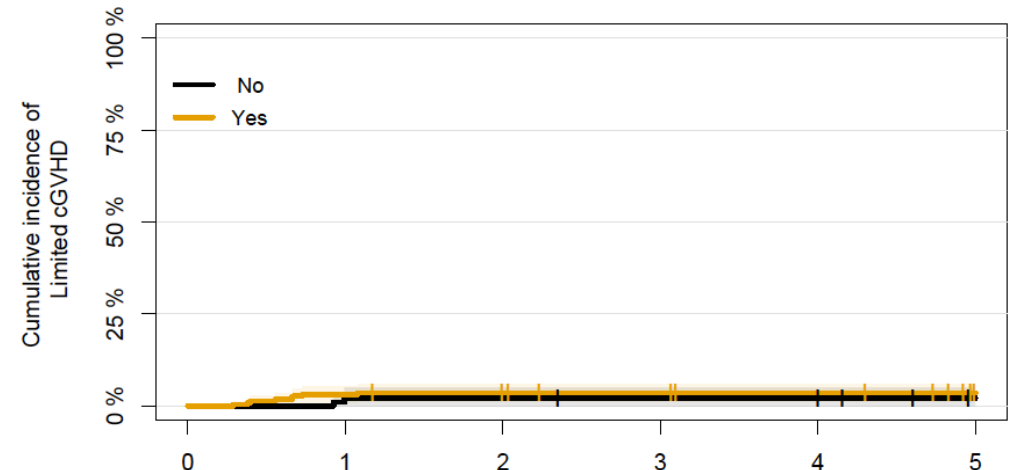

| ATG exposure | 0   | 1  | 2  | 3  | 4  | 5  |
|--------------|-----|----|----|----|----|----|
| No ATG       | 95  | 26 | 18 | 15 | 14 | 10 |
| <30          | 225 | 72 | 50 | 40 | 36 | 29 |
