# Supplementary material for: ATG Exposure in T Replete Transplant for Hematological Malignancies: Real World Analysis from BMT CTN 1202
Source: Research Square preprint supplement (doi:10.21203/rs.3.rs-9918950/v1), 2026-06-17
Supplement: Supplementary file 2 [file 1c2c0c3865b42ef302b61c1a.docx]

**Table 1: Patient Characteristics**

| **Characteristic** | **Overall**,  N = 3251 | **No ATG**,  N = 971 | **<30**,  N = 421 | **30-55**,  N = 1311 | ≥**55**,  N = 551 |
| --- | --- | --- | --- | --- | --- |
| **Age at transplant (years)** | 51 ± 17  [4 – 74] | 51 ± 18  [6 – 74] | 49 ± 23  [4 – 72] | 50 ± 15  [10 – 73] | 55 ± 14  [8 – 73] |
| **Sex** |  |  |  |  |  |
| Female | 139 (43%) | 41 (42%) | 18 (43%) | 64 (49%) | 16 (29%) |
| Male | 186 (57%) | 56 (58%) | 24 (57%) | 67 (51%) | 39 (71%) |
| **Disease** |  |  |  |  |  |
| ALL | 42 (13%) | 17 (18%) | 3 (7%) | 19 (15%) | 3 (5%) |
| AML | 115 (35%) | 33 (34%) | 14 (33%) | 44 (34%) | 24 (44%) |
| CLL | 6 (2%) | 1 (1%) | 1 (2%) | 3 (2%) | 1 (2%) |
| CML | 18 (6%) | 5 (5%) | 1 (2%) | 10 (8%) | 2 (4%) |
| HD | 7 (2%) | 1 (1%) | 2 (5%) | 3 (2%) | 1 (2%) |
| MDS | 63 (19%) | 18 (19%) | 8 (19%) | 25 (19%) | 12 (22%) |
| MPS | 22 (7%) | 7 (7%) | 1 (2%) | 11 (8%) | 3 (5%) |
| NHL | 43 (13%) | 12 (12%) | 9 (21%) | 14 (11%) | 8 (15%) |
| Other | 1 (0%) | 0 (0%) | 1 (2%) | 0 (0%) | 0 (0%) |
| Other acute leukemia | 3 (1%) | 1 (1%) | 1 (2%) | 1 (1%) | 0 (0%) |
| PCD | 4 (1%) | 1 (1%) | 1 (2%) | 1 (1%) | 1 (2%) |
| Polycythemia Vera | 1 (0%) | 1 (1%) | 0 (0%) | 0 (0%) | 0 (0%) |
| **Disease (categories)** |  |  |  |  |  |
| ALL | 42 (13%) | 17 (18%) | 3 (7%) | 19 (15%) | 3 (5%) |
| AML/MDS/CML | 196 (60%) | 56 (58%) | 23 (55%) | 79 (60%) | 38 (69%) |
| NHL/HD | 50 (15%) | 13 (13%) | 11 (26%) | 17 (13%) | 9 (16%) |
| Others | 37 (11%) | 11 (11%) | 5 (12%) | 16 (12%) | 5 (9%) |
| **Conditioning intensity** |  |  |  |  |  |
| Myeloablative | 196 (60%) | 57 (59%) | 20 (48%) | 92 (70%) | 27 (49%) |
| RIC/NMA | 129 (40%) | 40 (41%) | 22 (52%) | 39 (30%) | 28 (51%) |
| **Conditioning intensity - detailed** |  |  |  |  |  |
| MA - Bu based | 148 (46%) | 31 (32%) | 17 (40%) | 77 (59%) | 23 (42%) |
| MA - Other | 4 (1%) | 2 (2%) | 0 (0%) | 1 (1%) | 1 (2%) |
| MA - TBI based | 44 (14%) | 24 (25%) | 3 (7%) | 14 (11%) | 3 (5%) |
| NMA - Bu based | 42 (13%) | 10 (10%) | 3 (7%) | 14 (11%) | 15 (27%) |
| NMA - Mel based | 64 (20%) | 18 (19%) | 10 (24%) | 25 (19%) | 11 (20%) |
| NMA - Other | 11 (3%) | 6 (6%) | 3 (7%) | 0 (0%) | 2 (4%) |
| NMA - TBI based | 12 (4%) | 6 (6%) | 6 (14%) | 0 (0%) | 0 (0%) |
| **TBI used in conditioning** | 63 (19%) | 37 (38%) | 9 (21%) | 14 (11%) | 3 (5%) |
| **GVHD prophylaxis** |  |  |  |  |  |
| CNI ± MMF / MTX ± Other | 307 (95%) | 82 (85%) | 42 (100%) | 130 (99%) | 53 (98%) |
| Other | 16 (5%) | 14 (15%) | 0 (0%) | 1 (1%) | 1 (2%) |
| Unknown | 2 | 1 | 0 | 0 | 1 |
| **Graft source** |  |  |  |  |  |
| BM | 86 (26%) | 33 (34%) | 11 (26%) | 36 (27%) | 6 (11%) |
| PB | 239 (74%) | 64 (66%) | 31 (74%) | 95 (73%) | 49 (89%) |
| **ALC (10^3/mm3)** | 0.22 ± 0.39  [0.10 – 3.28] |  | 0.61 ± 0.73  [0.10 – 3.28] | 0.14 ± 0.17  [0.10 – 1.09] | 0.11 ± 0.09  [0.10 – 0.77] |
| 1Mean ± SD [Range]; n (%) | | | | | |

**Table 2: Main outcomes – Multivariable analysis**

**Table 2a: Overall Survival (Cox proportional hazards model)**

| **Characteristic** | **HR**1 | **95% CI**1 | **p-value** | | |
| --- | --- | --- | --- | --- | --- |
| **rATG exposure** |  |  | 0.007 | | |
| No ATG | Ref |  |  | | |
| <30 | 0.78 | 0.43, 1.40 |  | | |
| 30-55 | 1.23 | 0.82, 1.82 |  | | |
| ≥55 | 2.03 | 1.27, 3.24 |  | | |
| **Age at transplant (years)** | 1.02 | 1.01, 1.03 | <0.001 | | |
| **Sex** |  |  | 0.44 | | |
| Female | Ref |  |  | | |
| Male | 0.88 | 0.64, 1.21 |  | | |
| **Conditioning intensity** |  |  | 0.34 | | |
| Myeloablative | Ref |  |  | | |
| RIC/NMA | 0.85 | 0.60, 1.19 |  | | |
| **TBI used in conditioning** | 1.28 | 0.83, 1.97 | 0.28 | | |
| **Graft source** |  |  | 0.12 | | |
| BM | Ref |  |  | | |
| PB | 0.74 | 0.51, 1.07 |  | | |
| 1HR = Hazard Ratio, CI = Confidence Interval, Ref = Reference group, | | | |
| **Table 2b: CD4+IR (logistic regression model)** | | | | |
| **Characteristic** | **OR**1 | **95% CI**1 | **p-value** | | |
| **rATG exposure** |  |  | 0.003* | | |
| No ATG | Ref |  |  | | |
| <30 | 1.47 | 0.42, 5.48 |  | | |
| 30-55 | 0.58 | 0.20, 1.60 |  | | |
| ≥55 | 0.13 | 0.03, 0.49 |  | | |
| **Age at transplant (years)** | 0.98 | 0.95, 1.00 | 0.10 | | |
| **Sex** |  |  | 0.26 | | |
| Female | Ref |  |  | | |
| Male | 0.62 | 0.27, 1.41 |  | | |
| **Conditioning intensity** |  |  | 0.75 | | |
| Myeloablative | Ref |  |  | | |
| RIC/NMA | 1.16 | 0.48, 2.84 |  | | |
| **TBI used in conditioning** | 0.71 | 0.23, 2.20 | 0.55 | | |
| **Graft source** |  |  | 0.02* | | |
| BM | Ref |  |  | | |
| PB | 3.24 | 1.16, 9.97 |  | | |
| 1OR = Odds Ratio, CI = Confidence Interval, Ref = Reference group | | | | |

| **Table 2c: Relapse (cause-specific model)** | | | |
| --- | --- | --- | --- |
| **Characteristic** | **HR**1 | **95% CI**1 | **p-value** |
| **rATG exposure** |  |  | <0.001 |
| No ATG | Ref |  |  |
| <30 | 0.76 | 0.38, 1.54 |  |
| 30-55 | 1.83 | 1.13, 2.97 |  |
| ≥55 | 2.73 | 1.58, 4.73 |  |
| **Age at transplant (years)** | 1.02 | 1.00, 1.03 | 0.007 |
| **Sex** |  |  | 0.40 |
| Female | Ref |  |  |
| Male | 1.17 | 0.81, 1.70 |  |
| **Conditioning intensity** |  |  | 0.46 |
| Myeloablative | Ref |  |  |
| RIC/NMA | 1.17 | 0.77, 1.78 |  |
| **TBI used in conditioning** | 2.18 | 1.21, 3.91 | 0.01 |
| **Graft source** |  |  | 0.74 |
| BM | Ref |  |  |
| PB | 0.93 | 0.59, 1.45 |  |
| **Disease** |  |  | 0.40 |
| AML/MDS/CML | Ref |  |  |
| ALL | 0.65 | 0.32, 1.32 |  |
| NHL/HD | 0.92 | 0.52, 1.62 |  |
| Others | 1.28 | 0.76, 2.14 |  |
| 1HR = Hazard Ratio, CI = Confidence Interval, Ref = Reference group | | | |
| **Table 2d: TRM (cause-specific model)** | | | |

| **Characteristic** | **HR** | **95% CI** | **p-value** |
| --- | --- | --- | --- |
| **ATG exposure** |  |  | 0.48 |
| No ATG | — | — |  |
| <30 | 0.70 | 0.30, 1.66 |  |
| 30-55 | 0.98 | 0.54, 1.75 |  |
| ≥55 | 1.47 | 0.70, 3.12 |  |
| **Age at transplant (years)** | 1.03 | 1.01, 1.05 | 0.002 |
| **Sex** |  |  | 0.094 |
| Female | — | — |  |
| Male | 0.66 | 0.41, 1.07 |  |
| **Conditioning intensity** |  |  | 0.31 |
| Myeloablative | — | — |  |
| RIC/NMA | 0.76 | 0.44, 1.30 |  |
| **TBI used in conditioning** | 1.67 | 0.85, 3.28 | 0.15 |
| **Graft source** |  |  | 0.73 |
| BM | — | — |  |
| PB | 0.90 | 0.51, 1.59 |  |
|  | | | |

| 1HR = Hazard Ratio, CI = Confidence Interval, Ref = Reference group |
| --- |

**Table 3. Causes of Death by rATG exposure**

| **Characteristic** | **No ATG**  N = 471 | **<30**  N = 151 | **30-55**  N = 661 | **≥55**  N = 361 | **Overall**  N = 1641 |
| --- | --- | --- | --- | --- | --- |
| **Cause of death** |  |  |  |  |  |
| Bleeding | 0 (0) | 0 (0) | 1 (2) | 0 (0) | 1 (1) |
| GvHD | 12 (26) | 1 (7) | 15 (23) | 5 (14) | 33 (20) |
| Infection | 7 (15) | 6 (40) | 8 (12) | 4 (11) | 25 (15) |
| Organ failure | 5 (11) | 1 (7) | 4 (6) | 4 (11) | 14 (9) |
| Other | 4 (9) | 1 (7) | 5 (8) | 4 (11) | 14 (9) |
| Primary disease | 18 (38) | 6 (40) | 31 (47) | 18 (50) | 73 (45) |
| Secondary malignancy | 0 (0) | 0 (0) | 1 (2) | 1 (3) | 2 (1) |
| Vascular | 1 (2) | 0 (0) | 1 (2) | 0 (0) | 2 (1) |
| 1n (%) | | | | | |
