# Supplementary material for: ATG Exposure in T Replete Transplant for Hematological Malignancies: Real World Analysis from BMT CTN 1202
Source: Research Square preprint supplement (doi:10.21203/rs.3.rs-9918950/v1), 2026-06-17
Supplement: Supplementary file 3 [file 1ce7081f22de605b1f8144e4.pdf]

**Supplemental Table 1 : aGVHD by ATG exposure group**

**1a: aGVHD grade 2-4 by ATG exposure group**

| ATG exposure | At 6 months    |
|--------------|----------------|
| ≥55          | 35% (22%, 48%) |
| 30-55        | 39% (30%, 48%) |
| <30          | 26% (12%, 40%) |
| No ATG       | 40% (30%, 50%) |

**1b: aGVHD grade 3-4 by ATG exposure group**

| ATG exposure | At 6 months   |
|--------------|---------------|
| ≥55          | 6% (0%, 12%)  |
| 30-55        | 12% (6%, 18%) |
| <30          | 10% (1%, 19%) |
| No ATG       | 11% (4%, 17%) |
