# Supplementary figures and images for: ATG Exposure in T Replete Transplant for Hematological Malignancies: Real World Analysis from BMT CTN 1202
Source: Research Square preprint supplement (doi:10.21203/rs.3.rs-9918950/v1), 2026-06-17

**Supplemental Figure 1.  
Subjects Included**

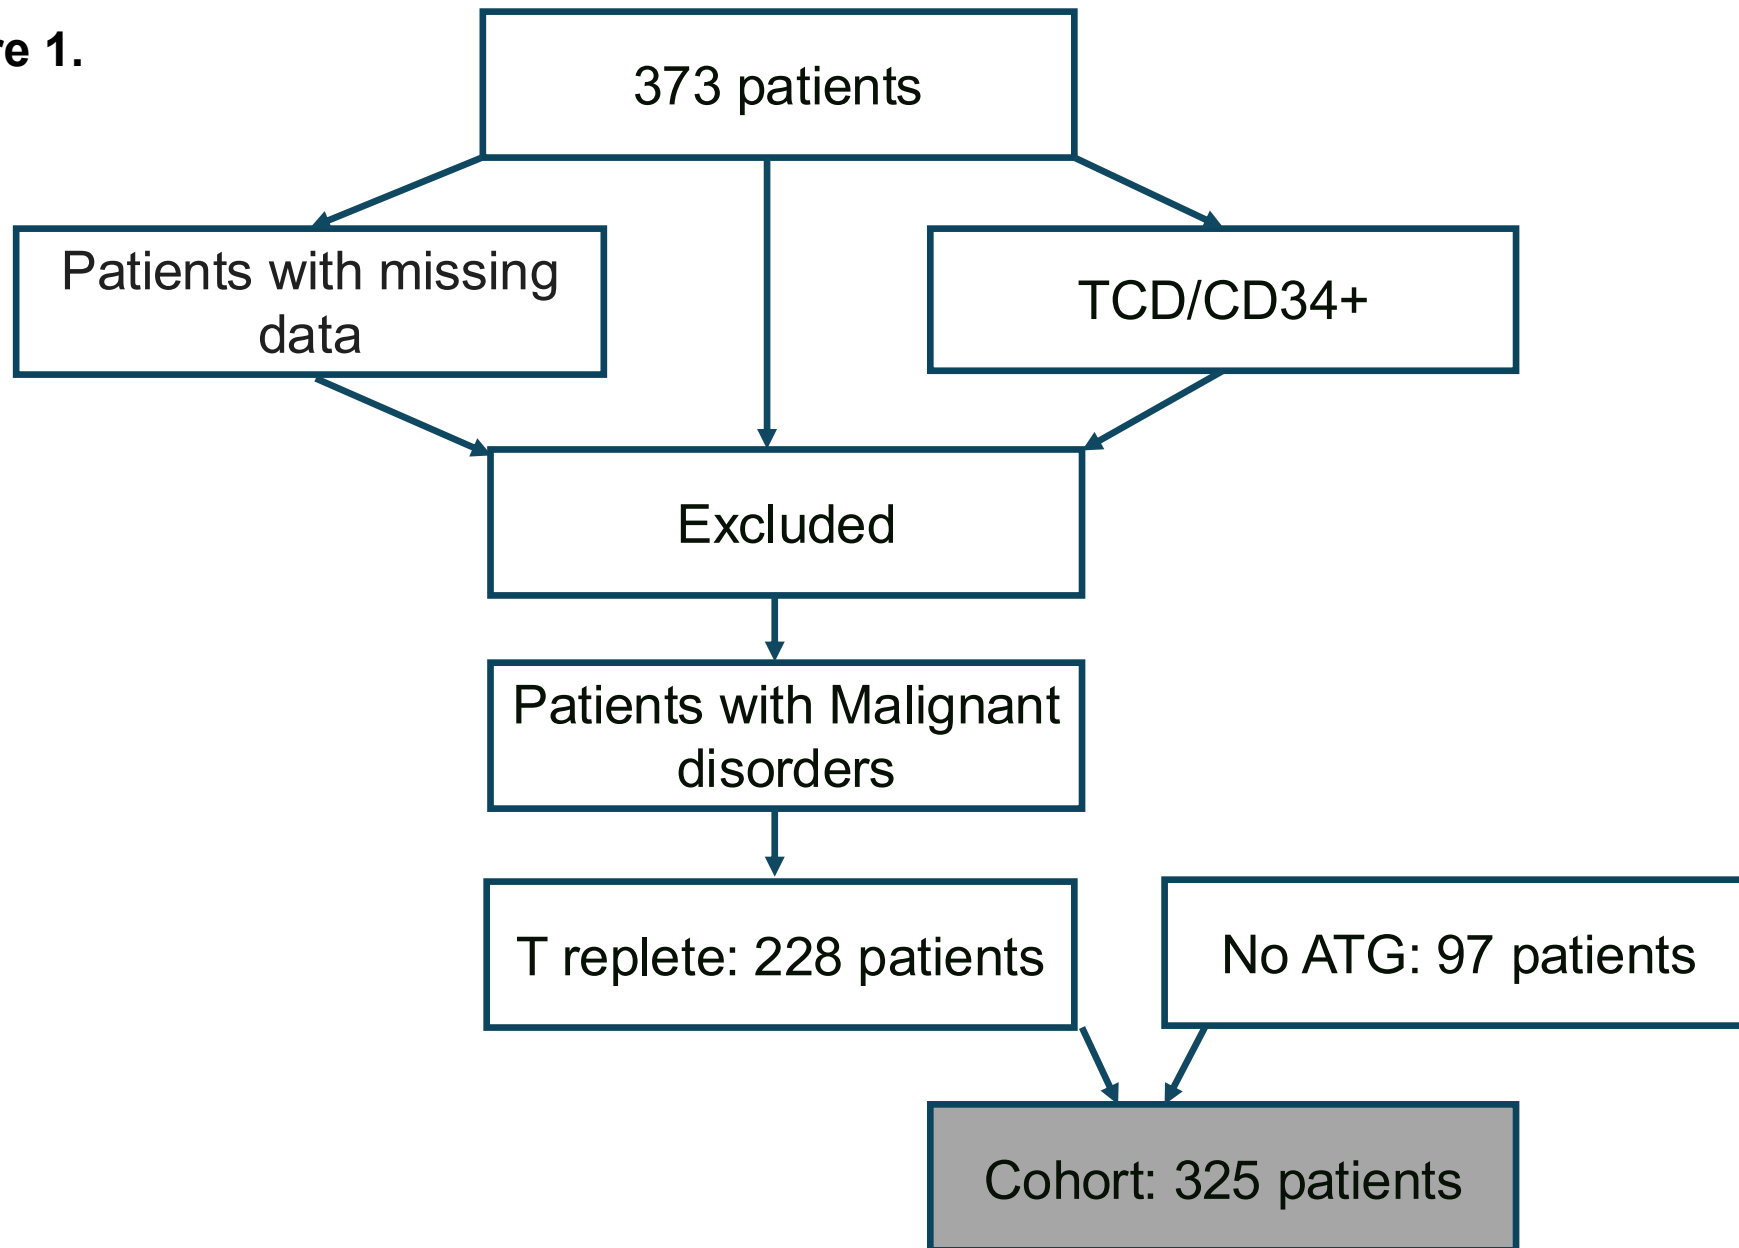

Supplement: Supplementary file 4 [file 92adf453d800331055fccca7.pdf]
